# Supplementary material for: PP1 promotes cyclin B destruction and the metaphase–anaphase transition by dephosphorylating CDC20
Source: PubMed Central journal article supplement — Mol Biol Cell. 2020 Oct 1;31(21):2315–30. doi: 10.1091/mbc.E20-04-0252 (PMC7851957; doi:10.1091/mbc.e20-04-0252), 2020-10-01
Supplement: mbc-31-2315-s001.pdf [file mbc-31-2315-s001.pdf]

# Supplemental Materials

*Molecular Biology of the Cell*

Bancroft *et al.*

## Supplemental Figure Legends

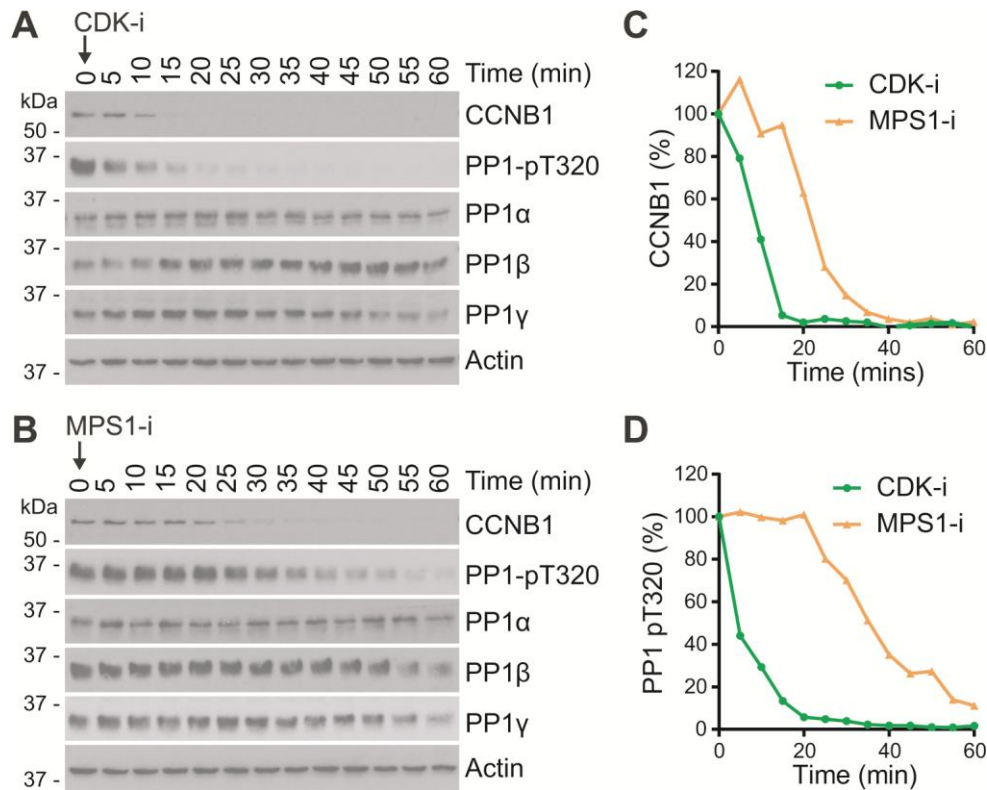

**Figure S1.** CDK1 inhibition accelerates cyclin B destruction at the metaphase-to-anaphase transition. **(A)** Synchronous progression of mitotic HeLa cells into anaphase was triggered with CDK1 inhibitor (CDK-i, 5  $\mu$ M flavopiridol) or **(B)** MPS1 inhibitor (MPS1-i, 2  $\mu$ M AZ3146), and samples were collected every 5 min and blotted with the indicated antibodies. **(C)** Cyclin B1 or **(D)** PP1 pT320 levels are plotted as a function of time from Western blot analysis of mitotic exit following CDK or MPS1 inhibition.

**Figure S2**

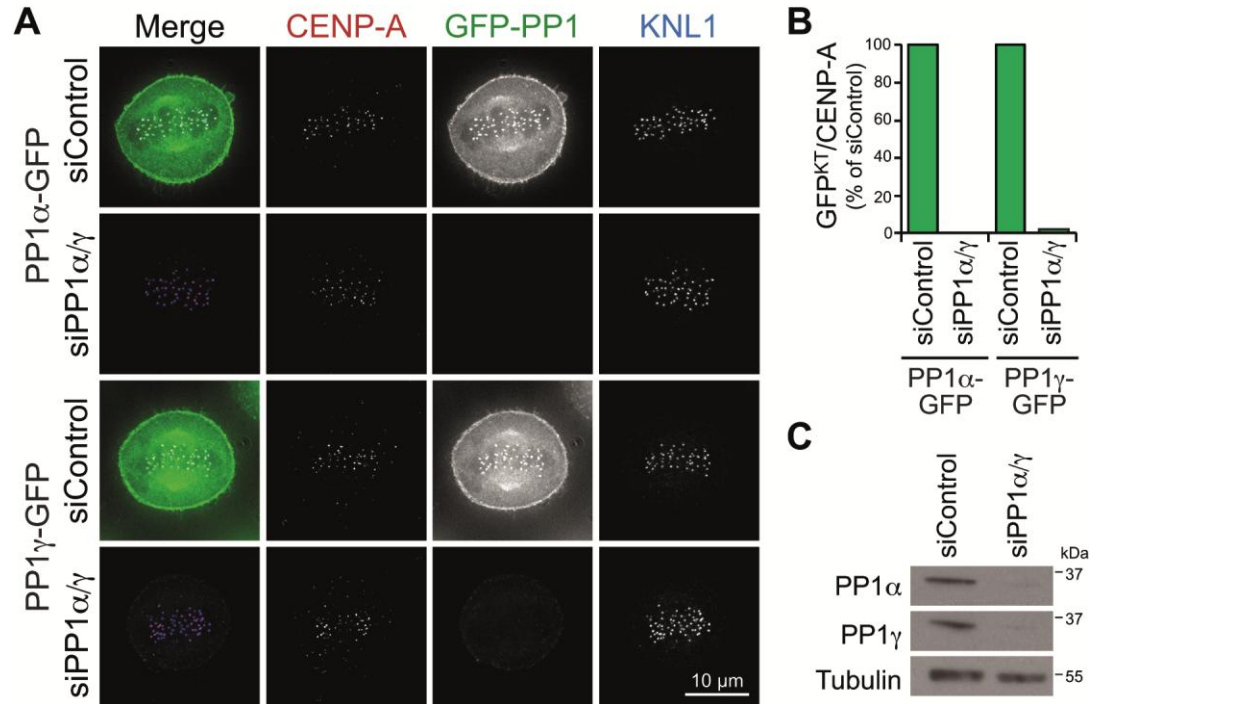

**Figure S2.** Characterisation of PP1 $\alpha$  and PP1 $\gamma$  localisation and depletion efficiency.

**(A)** HeLa Flp-In TRex cells induced to express PP1 $\alpha$ -GFP or PP1 $\gamma$ -GFP were depleted of PP1 $\alpha/\gamma$  and processed for immunofluorescence analysis. CENP-A and KNL1 were stained as reference markers for the kinetochores. **(B)** PP1 $\alpha$ -GFP or PP1 $\gamma$ -GFP kinetochore intensity in siControl or siPP1 $\alpha/\gamma$  co-depleted cells was quantified relative to CENP-A. **(C)** Western blot analysis of siControl and siPP1 $\alpha/\gamma$  co-depleted cells. Tubulin was used as a loading control.

**Figure S3**

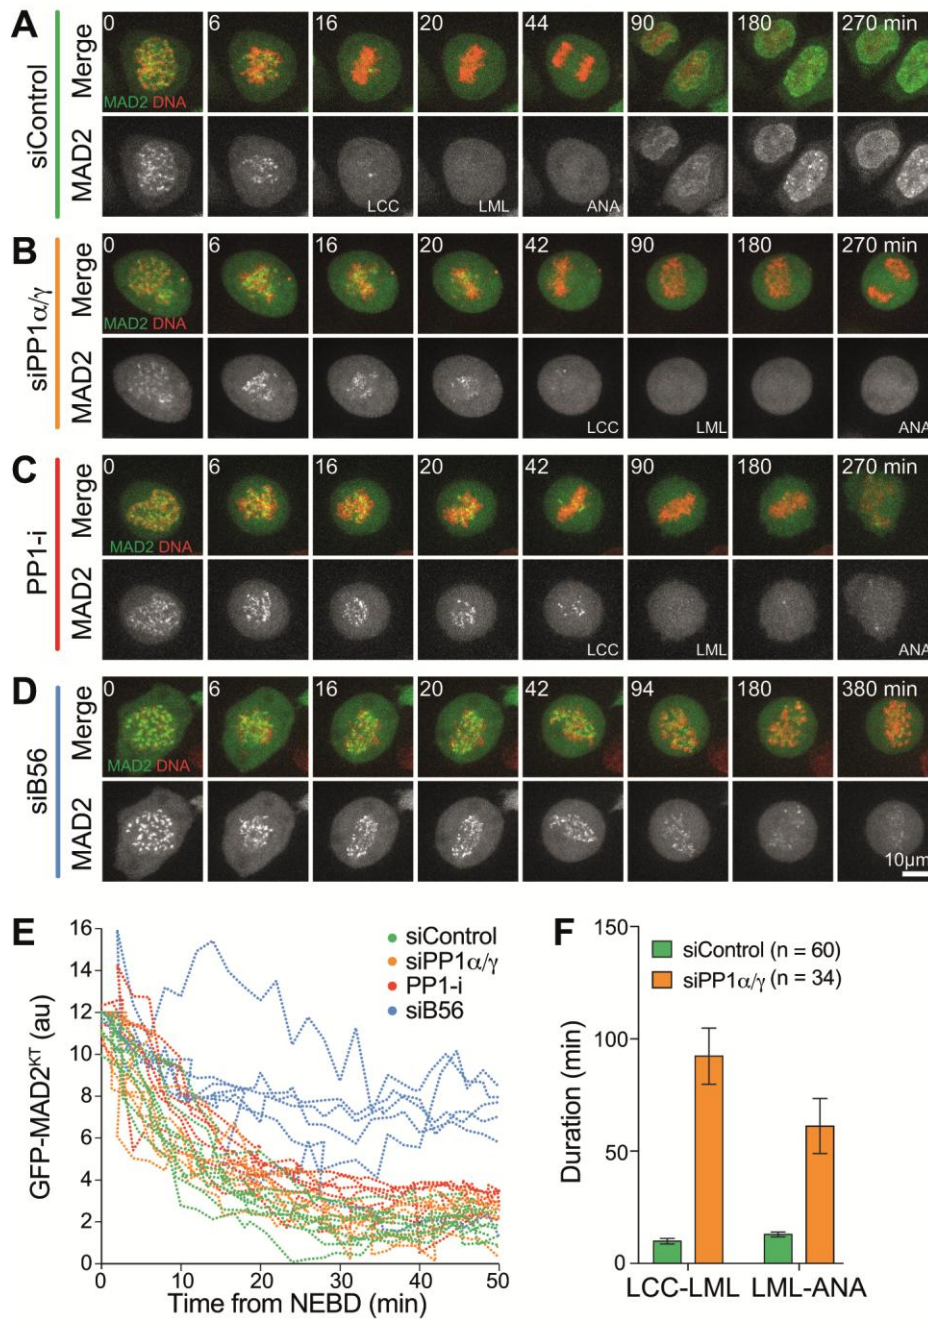

**Figure S3.** PP1 regulates cyclin B destruction downstream of checkpoint silencing. **(A)** HeLa cells stably expressing GFP-MAD2 were treated with control, **(B)** siPP1 $\alpha/\gamma$  or **(D)** siPP2A-B56 for 60 h, or **(C)** 5  $\mu$ M tautomycin PP1-inhibitor for 30 min before imaging.

DNA was visualised with SiR-Hoechst DNA dye. Cells were imaged every 2 mins for a total of 10 hrs. **(E)** Total cellular intensity of kinetochore-localised MAD2 (MAD2<sup>KT</sup>) is plotted as a function of time for siControl (n=7), siPP1 $\alpha/\gamma$  (n=6), PP1-i (n=6), and siPP2A-B56 (n=5). **(F)** Bar graphs showing the mean time interval  $\pm$  SD between the last chromosome congressed (LCC) and last MAD2 lost (LML), and last MAD2 lost and anaphase onset (ANA), in siControl (n=60) and siPP1 $\alpha/\gamma$  cells (n=34) expressing GFP-MAD2.

**Figure S4**

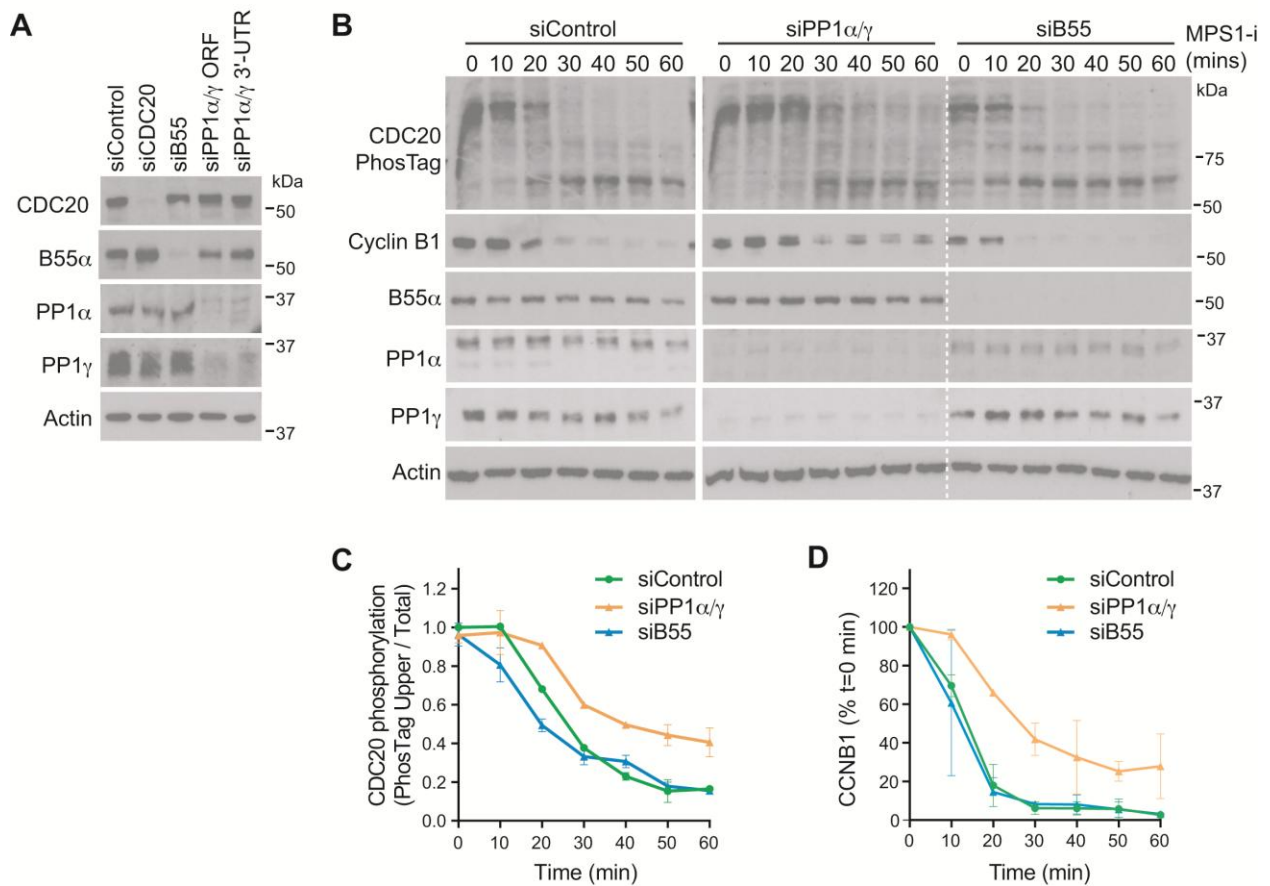

**Figure S4.** PP1 $\alpha/\gamma$  depletion, but not PP2A-B55 depletion, impairs CDC20

dephosphorylation and cyclin B degradation. **(A)** Western blot of HeLa cells transfected with siControl, siCDC20, siPP1 $\alpha/\gamma$  or siB55 duplexes to confirm specific depletion of the respective target proteins. **(B)** Synchronised HeLa cells transfected with siControl, siPP1 $\alpha/\gamma$  or siB55 duplexes were treated with MPS1-i to initiate mitotic exit. Samples were collected every 10 min and analysed by immunoblotting using PhosTag gels for CDC20 and standard gels for all other proteins with the indicated antibodies. **(C)** Phospho-CDC20 (top band in the PhosTag blot) relative to total CDC20 is plotted in the

line graph (mean  $\pm$  SD, n=2). **(D)** CCNB1 levels were measured as a function of time in siControl, siPP1 $\alpha/\gamma$  and siB55 and plotted in the line graph (mean  $\pm$  SD, n=2).

## Figure S5

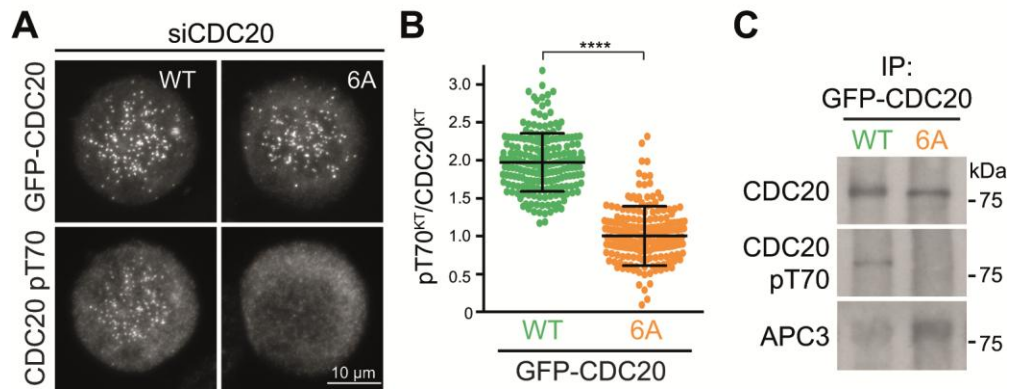

**Figure S5.** CDC20-pT70 antibodies specifically recognise phosphorylated CDC20. **(A)** HeLa Flp-In TRex cells depleted of the endogenous CDC20 and expressing GFP-CDC20<sup>WT</sup> or GFP-CDC20<sup>6A</sup> were treated with nocodazole for 20 min, then stained for CDC20 pT70. **(B)** CDC20 pT70 normalised for total GFP-CDC20 is plotted as mean  $\pm$  SD. **(C)** HeLa Flp-In TRex cells depleted of the endogenous CDC20 were induced for GFP-CDC20<sup>WT</sup> or GFP-CDC20<sup>6A</sup>, then arrested in mitosis. GFP-CDC20 was immunoprecipitated using anti-GFP antibodies (IP), and the immunoprecipitated samples Western blotted for total CDC20, CDC20 pT70 and APC3.
